# Supplementary material
Source: PubMed Central journal article supplement (PMC3732941)
Supplement: 1302968110_pnas.201302968SI.pdf [file 1302968110_pnas.201302968SI.pdf]

# Supporting Information

Hu et al. 10.1073/pnas.1302968110

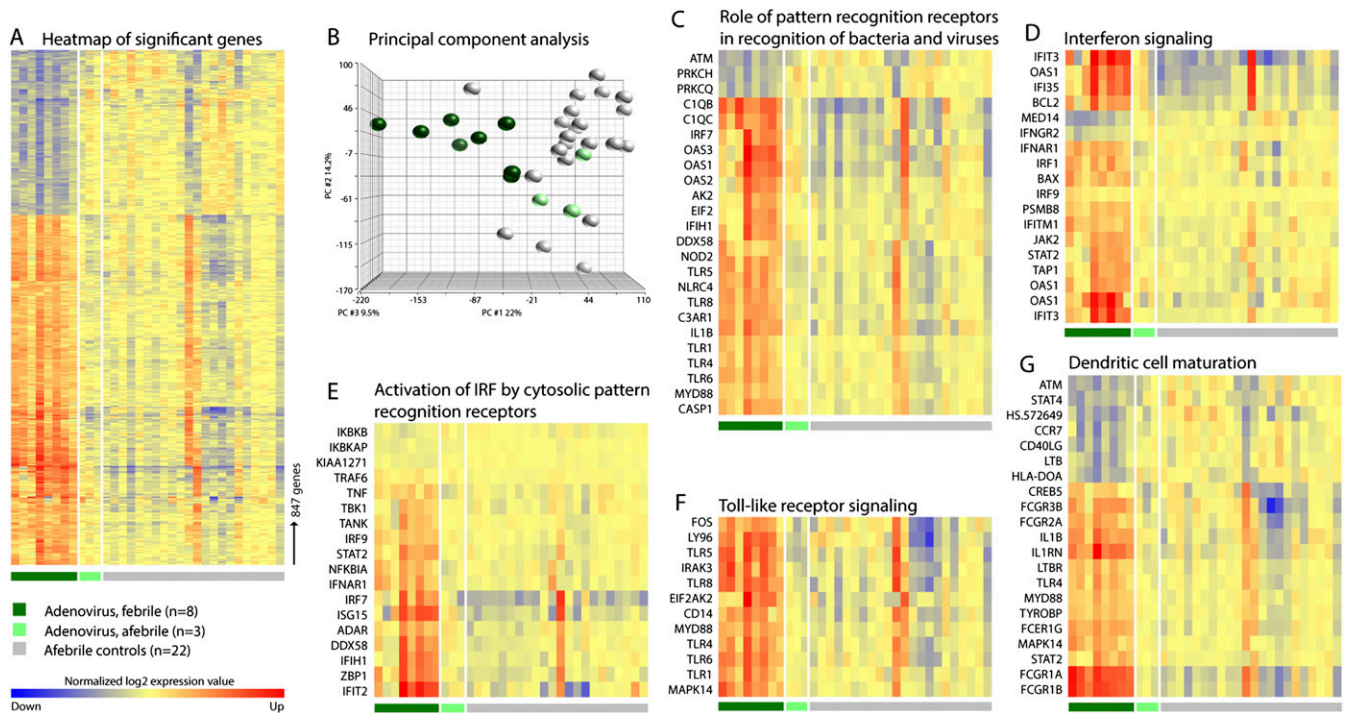

**Fig. S1.** Blood transcriptional profiles of febrile adenovirus-positive children are distinctively different from the profiles of healthy children and afebrile children with adenovirus infections. Microarray analysis was conducted on RNA extracted from blood samples of 11 children with confirmed adenovirus infection (8 febrile and 3 afebrile children) and 22 afebrile virus-negative children. (A) Hierarchical clustering of all probe sets with a statistically significant and greater than twofold difference between adenovirus-positive febrile children and virus-negative afebrile controls [false discovery rate (FDR) at 5%]. (B) Principal component analysis of differentially expressed genes, with each oval representing one child. (C–G) Hierarchical clustering of differentially expressed genes from A according to their expression intensity in five Ingenuity canonical pathways of particular interest, which are among the most strongly activated pathways in adenovirus-positive febrile children. Each row represents a gene with expression value that is normalized to the mean of the afebrile virus-negative control group. Gene names are listed to the left. Each column represents one individual. Red represents up-regulation, and blue represents down-regulation.

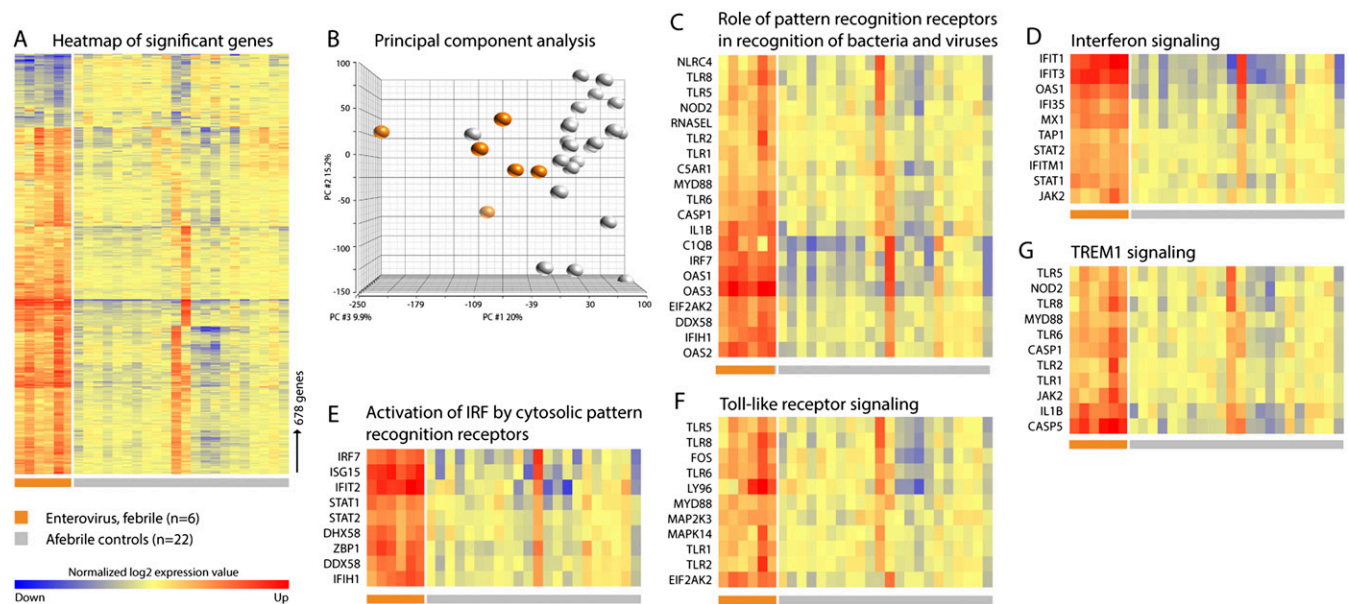

**Fig. S2.** Blood transcriptional profiles of enterovirus-positive febrile children are distinctly different the profiles of virus-negative afebrile children. Microarray analysis was conducted on RNA extracted from whole-blood samples of 6 enterovirus-positive febrile and 22 virus-negative afebrile children. (A) Hierarchical clustering of all probe sets with a statistically significant greater than twofold difference between enterovirus-positive febrile children and virus-negative afebrile controls ( $P < 0.05$ , FDR at 20%). (B) Principal component analysis of differentially expressed genes, with each oval representing one child. (C–G) Hierarchical clustering of differentially expressed genes in A according to their expression intensity in five Ingenuity canonical pathways of particular interest, which are among the most strongly activated pathways in febrile children with enterovirus infection. Each row represents a gene with expression value that is normalized to the mean of the afebrile virus-negative control group. Gene names are listed to the left. Each column represents one individual. Red represents up-regulation, and blue represents down-regulation.











**Table S1. Individual virus- and bacteria-specific profile gene probes with strongest effects**

| Gene symbol | Accession   | Adenovirus vs. control |                         | HHV-6 vs. control |                         | Enterovirus vs. control |                         | Bacteria vs. control |                         |
|-------------|-------------|------------------------|-------------------------|-------------------|-------------------------|-------------------------|-------------------------|----------------------|-------------------------|
|             |             | Fold change            | Adjusted <i>P</i> value | Fold change       | Adjusted <i>P</i> value | Fold change             | Adjusted <i>P</i> value | Fold change          | Adjusted <i>P</i> value |
| RETN        | NM_020415.2 | <b>6.626</b>           | <b>0.001</b>            | 1.746             | 0.273                   | 1.554                   | 0.475                   | 1.997                | 0.172                   |
| OLFM4       | NM_006418.3 | <b>5.776</b>           | <b>0.011</b>            | 1.029             | 0.655                   | 1.570                   | 0.539                   | 3.150                | 0.117                   |
| LYZ         | NM_000239.1 | <b>2.130</b>           | <b>0.011</b>            | -1.050            | 0.622                   | -1.225                  | 0.530                   | 1.045                | 0.493                   |
| RPS6KA5     | NM_004755.2 | <b>-1.701</b>          | <b>0.037</b>            | -1.179            | 0.467                   | 1.027                   | 0.672                   | 1.223                | 0.331                   |
| TSPYL2      | NM_022117.1 | <b>-1.692</b>          | <b>0.002</b>            | -1.113            | 0.437                   | -1.197                  | 0.390                   | -1.250               | 0.160                   |
| ITPR1       | NM_002222.4 | <b>-1.625</b>          | <b>0.008</b>            | -1.143            | 0.415                   | 1.092                   | 0.580                   | 1.345                | 0.120                   |
| CCL8        | NM_005623.2 | 2.353                  | 0.104                   | <b>12.885</b>     | <b>0.000</b>            | 2.003                   | 0.379                   | 1.059                | 0.505                   |
| CCL2        | NM_002982.3 | 2.179                  | 0.113                   | <b>9.752</b>      | <b>0.000</b>            | 2.271                   | 0.294                   | -1.197               | 0.448                   |
| LRRCS50     | NM_178452.3 | 1.212                  | 0.334                   | <b>3.426</b>      | <b>0.000</b>            | 1.347                   | 0.439                   | -1.074               | 0.470                   |
| VPS28       | NM_016208.2 | -1.069                 | 0.434                   | <b>-1.625</b>     | <b>0.015</b>            | -1.048                  | 0.640                   | 1.084                | 0.423                   |
| NME4        | NM_005009.2 | 1.108                  | 0.363                   | <b>-1.562</b>     | <b>0.020</b>            | 1.163                   | 0.491                   | -1.116               | 0.376                   |
| MBNL3       | NM_133486.1 | 1.305                  | 0.346                   | 1.349             | 0.440                   | <b>3.190</b>            | <b>0.096</b>            | 1.649                | 0.228                   |
| HAGH        | NM_005326.4 | 1.342                  | 0.212                   | -1.103            | 0.567                   | <b>2.162</b>            | <b>0.096</b>            | 1.100                | 0.449                   |
| TMPRSS9     | NM_182973.1 | 1.236                  | 0.238                   | 1.048             | 0.610                   | <b>2.057</b>            | <b>0.059</b>            | 1.301                | 0.226                   |
| KLC3        | NM_177417.1 | 1.076                  | 0.453                   | -1.142            | 0.498                   | <b>1.999</b>            | <b>0.083</b>            | 1.307                | 0.245                   |
| ST6GALNAC4  | NM_175039.3 | 1.286                  | 0.195                   | -1.056            | 0.601                   | <b>1.945</b>            | <b>0.079</b>            | -1.045               | 0.482                   |
| PROS1       | NM_000313.1 | 1.162                  | 0.294                   | -1.029            | 0.628                   | 1.265                   | 0.382                   | <b>2.473</b>         | <b>0.001</b>            |
| SCGB1C1     | NM_145651.2 | -1.017                 | 0.522                   | 1.152             | 0.492                   | 1.230                   | 0.495                   | <b>2.463</b>         | <b>0.004</b>            |
| ARAP3       | NM_022481.5 | 1.005                  | 0.535                   | -1.104            | 0.545                   | 1.268                   | 0.446                   | <b>2.201</b>         | <b>0.007</b>            |
| STXBP5      | NM_139244.2 | -1.284                 | 0.160                   | -1.281            | 0.244                   | 1.094                   | 0.595                   | <b>2.050</b>         | <b>0.004</b>            |
| GZMH        | NM_033423.3 | -1.929                 | 0.106                   | -1.733            | 0.234                   | -2.088                  | 0.260                   | <b>-5.258</b>        | <b>0.003</b>            |
| KIR2DL3     | NM_014511.3 | -1.016                 | 0.529                   | -1.092            | 0.601                   | -1.642                  | 0.346                   | <b>-3.389</b>        | <b>0.007</b>            |
| KIR2DL4     | NM_002255.3 | 1.165                  | 0.384                   | 1.062             | 0.613                   | -1.408                  | 0.405                   | <b>-2.646</b>        | <b>0.008</b>            |
| KIR3DL1     | NM_013289.1 | -1.018                 | 0.524                   | -1.101            | 0.572                   | -1.354                  | 0.433                   | <b>-2.572</b>        | <b>0.008</b>            |
| MT1X        | NM_005952.2 | 1.107                  | 0.414                   | 1.291             | 0.309                   | 1.170                   | 0.545                   | <b>-1.787</b>        | <b>0.041</b>            |
| OSBPL5      | NM_145638.1 | -1.014                 | 0.519                   | 1.187             | 0.325                   | -1.101                  | 0.566                   | <b>-1.767</b>        | <b>0.007</b>            |

These probes were selected because they had significant up- or down-regulation in children positive for only one virus or with acute bacterial infection using an adjusted *P* value of 0.05. Gene transcription in children positive for only one virus and children with acute bacterial infection were each compared with gene transcription in afebrile virus-negative control children. Candidate genes were derived using the shrunken centroid algorithm procedure in the Prediction of Microarray Analysis tool from Stanford University (<http://www-stat.stanford.edu/~tibs/SAM/>). Probes were sorted within each virus/bacteria group by descending fold change (when up-regulated) or ascending fold change (when down-regulated). Bold and italic fonts indicate genes that differed significantly at adjusted *P* value < 0.05.

**Table S2. Correlation in expression level between RT-qPCR and microarray results**

| Classifier | Pearson correlation of coefficient | <i>P</i> value |
|------------|------------------------------------|----------------|
| IFI27      | 0.722                              | 2.17E-07       |
| IFIT1      | 0.903                              | 3.55E-15       |
| ISG15      | 0.775                              | 6.79E-09       |
| ITGAM      | 0.925                              | 4.29E-17       |
| ITGAX      | 0.813                              | 3.11E-10       |
| ITGB5      | 0.886                              | 6.86E-14       |
| OASL       | 0.937                              | 1.66E-18       |
| OTOF       | 0.927                              | 2.55E-17       |
| PROS1      | 0.705                              | 5.47E-07       |



**Table S3. Demographics of 65 cases in the study**

| Patient ID | Pathogen          | Fever | Sex    | Age (mo) | Ethnicity | Antibiotics used | WBC (×1,000) | Neut (%) | Bands (%) | Lymph (%) | Mono (%) | WBC status by age-specific normal values | WBC status by cutoff of 15,000 |
|------------|-------------------|-------|--------|----------|-----------|------------------|--------------|----------|-----------|-----------|----------|------------------------------------------|--------------------------------|
| 9006       | Adenovirus        | Yes   | Female | 4        | White     | Yes              | 28.7         | 78       | 5         | 14        | 3        | Increased                                | >15,000                        |
| 9010       | Adenovirus        | Yes   | Male   | 24       | Black     | Yes              | 25.6         | 66       | 9         | 15        | 10       | Increased                                | >15,000                        |
| 9021       | Adenovirus        | Yes   | Female | 2        | Black     | Yes              | 25.2         | 33       | 7         | 31        | 27       | Increased                                | >15,000                        |
| 9170       | Adenovirus        | Yes   | Female | 13       | Black     | Yes              | 18.2         | 78       | 10        | 3         | 6        | Increased                                | >15,000                        |
| 9203       | Adenovirus        | Yes   | Female | 9        | White     | Yes              | 30.9         | 54       | 12        | 23        | 10       | Increased                                | >15,000                        |
| 9282       | Adenovirus        | Yes   | Female | 17       | White     | Yes              | 17.1         | 72       | 10        | 10        | 7        | Normal                                   | >15,000                        |
| 9289       | Adenovirus        | Yes   | Female | 15       | Other     | No               | 24.6         | 84       | 0         | 12        | 4        | Increased                                | >15,000                        |
| 9340       | Adenovirus        | Yes   | Male   | 2        | White     | Yes              | 15.2         | 37       | 1         | 44        | 16       | Normal                                   | >15,000                        |
| 9081       | Adenovirus        | No    | Male   | 7        | White     |                  |              |          |           |           |          |                                          |                                |
| 9097       | Adenovirus        | No    | Female | 14       | White     |                  |              |          |           |           |          |                                          |                                |
| 9134       | Adenovirus        | No    | Female | 26       | White     |                  |              |          |           |           |          |                                          |                                |
| 9022       | HHV-6             | Yes   | Female | 10       | Other     | Yes              | 15.1         | 85       | 0         | 13        | 2        | Normal                                   | >15,000                        |
| 9023       | HHV-6             | Yes   | Female | 12       | Black     | No               | 10.1         | 70       | 2         | 23        | 5        | Normal                                   | Not >15,000                    |
| 9032       | HHV-6             | Yes   | Male   | 3        | Black     | Yes              | 8.9          | 41       | 2         | 42        | 12       | Normal                                   | Not >15,000                    |
| 9064       | HHV-6             | Yes   | Female | 7        | Black     | No               | 6.1          | 66       | 0         | 25        | 8        | Normal                                   | Not >15,000                    |
| 9156       | HHV-6             | Yes   | Male   | 3        | Black     | No               | 7            | 15       | 9         | 48        | 22       | Normal                                   | Not >15,000                    |
| 9300       | HHV-6             | Yes   | Male   | 2        | Black     | No               | 6.1          | 52       | 3         | 26        | 11       | Normal                                   | Not >15,000                    |
| 9416       | HHV-6             | Yes   | Male   | 12       | White     | No               | 5.7          | 47       | 0         | 41        | 11       | Decreased                                | Not >15,000                    |
| 9575       | HHV-6             | Yes   | Male   | 25       | White     | Yes              | 5.6          | 42       | 1         | 48        | 6        | Normal                                   | Not >15,000                    |
| 9437       | HHV-6             | No    | Male   | 17       | White     |                  |              |          |           |           |          |                                          |                                |
| 9515       | HHV-6             | No    | Male   | 18       | Black     |                  |              |          |           |           |          |                                          |                                |
| 9008       | Enterovirus       | Yes   | Male   | 8        | White     | No               | 12.1         | 58       | 0         | 29        | 13       | Normal                                   | Not >15,000                    |
| 9016       | Enterovirus       | Yes   | Male   | 29       | White     | No               | 12.2         | 70       | 0         | 24        | 6        | Normal                                   | Not >15,000                    |
| 9267       | Enterovirus       | Yes   | Male   | 2        | White     | Yes              | 7.9          | 42       | 1         | 52        | 4        | Normal                                   | Not >15,000                    |
| 9450       | Enterovirus       | Yes   | Female | 16       | Black     | Yes              | 15           | 49       | 1         | 44        | 5        | Normal                                   | >15,000                        |
| 9467       | Enterovirus       | Yes   | Male   | 32       | Black     | Yes              | 11.7         | 80       | 7         | 9         | 4        | Normal                                   | Not >15,000                    |
| 9587       | Enterovirus       | Yes   | Female | 10       | Black     |                  |              |          |           |           |          |                                          |                                |
| 9087       | Rhinovirus        | No    | Male   | 3        | White     |                  |              |          |           |           |          |                                          |                                |
| 9113       | Rhinovirus        | No    | Male   | 7        | White     |                  |              |          |           |           |          |                                          |                                |
| 9118       | Rhinovirus        | No    | Male   | 26       | White     |                  |              |          |           |           |          |                                          |                                |
| 9133       | Rhinovirus        | No    | Male   | 5        | White     |                  |              |          |           |           |          |                                          |                                |
| 9149       | Rhinovirus        | No    | Male   | 6        | White     |                  |              |          |           |           |          |                                          |                                |
| 9150       | Rhinovirus        | No    | Female | 12       | White     |                  |              |          |           |           |          |                                          |                                |
| 9151       | Rhinovirus        | No    | Female | 30       | White     |                  |              |          |           |           |          |                                          |                                |
| 9163       | Rhinovirus        | No    | Female | 32       | White     |                  |              |          |           |           |          |                                          |                                |
| 9298       | <i>E. coli</i>    | Yes   | Female | 30       | White     | Yes              | 30.6         | 84       | 0         | 11        | 5        | Increased                                | >15,000                        |
| 9359       | Bacteria          | Yes   | Male   | 16       | Black     | Yes              | 20.3         | 73       | 1         | 22        | 2        | Increased                                | >15,000                        |
| 9397       | MRSA              | Yes   | Male   | 3        | Black     | Yes              | 16           | 66       | 1         | 25        | 8        | Normal                                   | >15,000                        |
| 9468       | <i>Salmonella</i> | Yes   | Male   | 25       | White     | No               | 17.8         | 55       | 0         | 26        | 5        | Increased                                | >15,000                        |
| 9501       | <i>E. coli</i>    | Yes   | Male   | 4        | White     | Yes              | 12.2         | 67       | 2         | 20        | 8        | Normal                                   | Not >15,000                    |
| 9519       | MSSA              | Yes   | Male   | 32       | White     | Yes              | 16           | 65       | 0         | 25        | 6        | Increased                                | >15,000                        |
| 9523       | MSSA              | Yes   | Female | 10       | Black     | Yes              | 19.8         | 53       | 0         | 38        | 6        | Increased                                | >15,000                        |
| 9602       | MRSA              | Yes   | Male   | 20       | Black     | Yes              | 17.1         | 72       | 0         | 20        | 8        | Normal                                   | >15,000                        |
| 9050       | Control           | No    | Male   | 10       | White     |                  |              |          |           |           |          |                                          |                                |
| 9051       | Control           | No    | Male   | 17       | Black     |                  |              |          |           |           |          |                                          |                                |
| 9057       | Control           | No    | Male   | 10       | White     |                  |              |          |           |           |          |                                          |                                |
| 9059       | Control           | No    | Male   | 9        | White     |                  |              |          |           |           |          |                                          |                                |
| 9061       | Control           | No    | Male   | 4        | Black     |                  |              |          |           |           |          |                                          |                                |
| 9062       | Control           | No    | Male   | 17       | White     |                  |              |          |           |           |          |                                          |                                |
| 9066       | Control           | No    | Female | 6        | White     |                  |              |          |           |           |          |                                          |                                |
| 9067       | Control           | No    | Female | 4        | White     |                  |              |          |           |           |          |                                          |                                |
| 9075       | Control           | No    | Male   | 3        | White     |                  |              |          |           |           |          |                                          |                                |
| 9091       | Control           | No    | Male   | 11       | White     |                  |              |          |           |           |          |                                          |                                |
| 9093       | Control           | No    | Male   | 10       | White     |                  |              |          |           |           |          |                                          |                                |
| 9110       | Control           | No    | Female | 12       | Black     |                  |              |          |           |           |          |                                          |                                |
| 9114       | Control           | No    | Male   | 25       | White     |                  |              |          |           |           |          |                                          |                                |
| 9115       | Control           | No    | Male   | 2        | White     |                  |              |          |           |           |          |                                          |                                |
| 9116       | Control           | No    | Male   | 17       | White     |                  |              |          |           |           |          |                                          |                                |
| 9117       | Control           | No    | Male   | 28       | White     |                  |              |          |           |           |          |                                          |                                |
| 9125       | Control           | No    | Female | 33       | White     |                  |              |          |           |           |          |                                          |                                |
| 9137       | Control           | No    | Female | 20       | White     |                  |              |          |           |           |          |                                          |                                |

Table S3. Cont.

| Patient ID | Pathogen | Fever | Sex    | Age (mo) | Ethnicity | Antibiotics used | WBC ( $\times 1,000$ ) | Neut (%) | Bands (%) | Lymph (%) | Mono (%) | WBC status by age-specific normal values | WBC status by cutoff of 15,000 |
|------------|----------|-------|--------|----------|-----------|------------------|------------------------|----------|-----------|-----------|----------|------------------------------------------|--------------------------------|
| 9146       | Control  | No    | Male   | 22       | White     |                  |                        |          |           |           |          |                                          |                                |
| 9147       | Control  | No    | Female | 9        | White     |                  |                        |          |           |           |          |                                          |                                |
| 9187       | Control  | No    | Female | 5        | White     |                  |                        |          |           |           |          |                                          |                                |
| 9294       | Control  | No    | Male   | 11       | White     |                  |                        |          |           |           |          |                                          |                                |

Lymph, lymphocyte; mono, monocyte; MRSA, methicillin-resistant *Staphylococcus aureus*; MSSA, methicillin-sensitive *Staphylococcus aureus*; neut, neutrophil; WBC, white blood cell.
